# Supplementary material
Source: PubMed Central journal article supplement (PMC8821325)
Supplement: NIHMS1754302-supplement-supinfo.pdf [file NIHMS1754302-supplement-supinfo.pdf]

**Supplemental Table S1.** Self-rated hearing vs objective PTAs stratified by cognition

| COGNITIVELY NORMAL        |                          |            |                     |                |
|---------------------------|--------------------------|------------|---------------------|----------------|
| Self-rated hearing status | Audiometric hearing loss |            |                     | Total (n=2525) |
|                           | None                     | Mild       | Moderate or greater |                |
| Excellent to good         | 76.7 (686)               | 47.8 (477) | 7.3 (46)            | 100.0 (1209)   |
| A little trouble          | 17.4 (156)               | 30.8 (307) | 21.5 (136)          | 100.0 (599)    |
| Moderate or greater       | 5.9 (53)                 | 21.4 (214) | 71.2 (450)          | 100.0 (717)    |
| MILD COGNITIVE IMPAIRMENT |                          |            |                     |                |
| Self-rated hearing status | Audiometric hearing loss |            |                     | Total (n=608)  |
|                           | None                     | Mild       | Moderate or greater |                |
| Excellent to good         | 76.4 (133)               | 51.6 (126) | 14.2 (27)           | 100.0 (286)    |
| A little trouble          | 15.5 (27)                | 28.3 (69)  | 24.7 (47)           | 100.0 (143)    |
| Moderate or greater       | 8.1 (14)                 | 20.1 (49)  | 61.1 (116)          | 100.0 (179)    |
| DEMENTIA                  |                          |            |                     |                |
| Self-rated hearing status | Audiometric hearing loss |            |                     | Total (n=193)  |
|                           | None                     | Mild       | Moderate or greater |                |
| Excellent to good         | 60.0 (21)                | 53.7 (44)  | 26.3 (20)           | 100.0 (85)     |
| A little trouble          | 28.6 (10)                | 24.4 (20)  | 21.1 (16)           | 100.0 (46)     |
| Moderate or greater       | 11.4 (4)                 | 22.0 (18)  | 52.6 (40)           | 100.0 (62)     |

**Supplemental Figure S1.** Audiometric hearing for self-rated hearing by cognition level

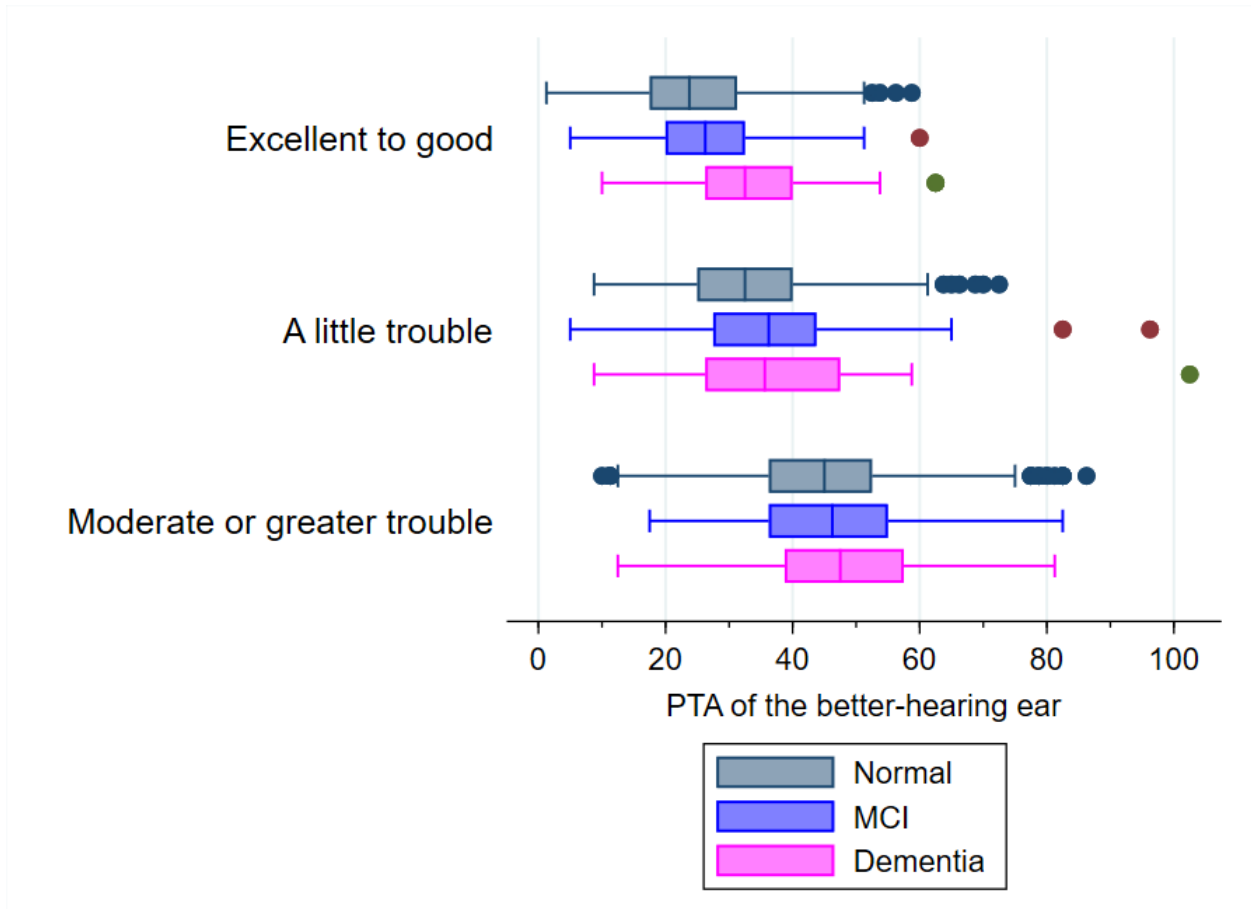

**Supplemental Table S2.** Demographic and hearing-related characteristics of participants with cognitive impairment, audiometric testing, and proxy-rated hearing (n = 520)

| Characteristics, n (%)                                | Cognitive Status |                      |                  | p-value <sup>2</sup> |
|-------------------------------------------------------|------------------|----------------------|------------------|----------------------|
|                                                       | MCI<br>(n = 427) | Dementia<br>(n = 93) | All<br>(n = 520) |                      |
| Age at visit 6, years                                 |                  |                      |                  |                      |
| Average age (SD) <sup>1</sup>                         | 80.3 (4.6)       | 81.9 (5.1)           | 80.6 (4.7)       | <b>0.003</b>         |
| 70-74                                                 | 11.9 (51)        | 6.5 (6)              | 11.0 (57)        | <b>0.02</b>          |
| 75-79                                                 | 42.2 (180)       | 32.3 (30)            | 40.4 (210)       |                      |
| ≥ 80                                                  | 45.9 (196)       | 61.3 (57)            | 48.7 (253)       |                      |
| Female                                                | 56.4 (241)       | 55.9 (52)            | 56.4 (93)        | 0.93                 |
| Black, %                                              | 18.3 (78)        | 30.1 (28)            | 20.4 (106)       | <b>0.01</b>          |
| Education                                             |                  |                      |                  |                      |
| Less than high school                                 | 10.3 (44)        | 21.5 (20)            | 12.3 (64)        | <b>0.001</b>         |
| High school, GED, or vocational school                | 35.8 (153)       | 41.9 (39)            | 36.9 (192)       |                      |
| At least some college                                 | 53.9 (230)       | 36.6 (34)            | 50.8 (264)       |                      |
| Income at visit 1                                     |                  |                      |                  |                      |
| < 25,000                                              | 21.6 (92)        | 32.3 (30)            | 23.5 (122)       | 0.13                 |
| 25,000 – 49,999                                       | 42.4 (181)       | 33.3 (31)            | 40.8 (212)       |                      |
| ≥ 50,000                                              | 36.1 (154)       | 34.4 (32)            | 35.8 (186)       |                      |
| Degree of hearing loss by PTA                         |                  |                      |                  |                      |
| PTA in better hearing ear in dB HL, (SD) <sup>1</sup> | 34.8 (14.2)      | 35.5 (13.8)          | 34.9 (14.1)      | 0.64                 |
| Any hearing loss                                      | 71.2 (304)       | 76.3 (71)            | 72.1 (375)       | 0.32                 |
| No hearing loss                                       | 28.8 (123)       | 23.7 (22)            | 27.9 (145)       | 0.58                 |
| Mild hearing loss                                     | 39.8 (170)       | 44.1 (41)            | 40.6 (211)       |                      |
| Moderate or greater hearing loss                      | 31.4 (134)       | 32.3 (30)            | 31.5 (164)       |                      |
| Proxy-rated hearing loss                              | 32.1 (137)       | 50.5 (47)            | 35.4 (184)       | <b>0.001</b>         |
| Current hearing aid user                              | 21.3 (91)        | 20.4 (19)            | 21.2 (110)       | 0.85                 |

Significant p-values are designated in bold. Abbreviations: MCI = mild cognitive impairment; PTA = pure tone average, dB HL = decibels in hearing level

<sup>1</sup> Represented as a continuous variable with the standard deviation in parenthesis.

<sup>2</sup> A one-way ANOVA was used for continuous data, while the  $\chi^2$  test was used for categorical data.
